# Supplementary material for: smartPARE: An R Package for Efficient Identification of True mRNA Cleavage Sites
Source: Int J Mol Sci. 2021 Apr 20;22(8):4267. doi: 10.3390/ijms22084267 (PMC8073297; doi:10.3390/ijms22084267)
Supplement: Supplementary file 1 [file ijms-22-04267-s001.zip]

Archive with 4 entries (3 files):
- Suppl/
- Suppl/Dataset 1.xlsx
- Suppl/Dataset 2.xlsx
- Suppl/Suppl Figs and Tables IJMS-final.pdf
